## Additive prognostic value of vascular aging and coronary artery calcium for all-cause mortality in the Heinz Nixdorf Recall Study

T. Weber<sup>1</sup>, S. Wassertheurer<sup>2</sup>, B. Hametner<sup>2</sup>, C.C. Mayer<sup>2</sup>, S. Moebus<sup>3</sup>, S. Schramm<sup>3</sup>, U. Roggenbuck<sup>3</sup>, N. Lehmann<sup>3</sup>, K.H. Joeckel<sup>3</sup>, R. Erbel<sup>3</sup>

<sup>1</sup>Klinikum Wels-Grieskirchen, Wels, Austria; <sup>2</sup>AIT-Austrian Institute of Technology, Vienna, Austria; <sup>3</sup>University Clinic Essen, Institute for Medical Informatics, Biometry and Epidemiology, Essen, Germany

On behalf of Heinz Nixdorf Recall Study

**Funding Acknowledgement:** Type of funding source: Public grant(s) – National budget only. Main funding source(s): Heinz Nixdorf Foundation, German Ministry of Education and Science (BMBF)

**Background:** Vascular aging, defined by aortic pulse wave velocity (aoPWV), as well as coronary artery calcium (CaC), are emerging risk predictors.

**Purpose:** To investigate the prognostic role of functional (vascular aging) and structural (CaC) arterial parameters in individuals without established cardiovascular disease.

**Methods:** We utilized our recently established population-based reference values for healthy (HVA), normal (NVA) and early (EVA) vascular aging in the population-based Heinz Nixdorf Recall (HNR) study. HVA was the lowest, and EVA the highest age- and sex-specific decile of estimated aoPWV, derived from radial waveforms with a validated regression formula. CaC was measured with electron beam computed tomography (Agatston-score). The additive prognostic value of both parameters for all-cause mortality was tested, using Kaplan Meier curves and Cox Regression models. The latter included age, sex, diastolic blood pressure, cholesterol, and diabetes as covariates.

**Results:** We included 1805 participants (976 women), mean age was 68.2 years (range 55–85), mean blood pressure 129/76 mm Hg. 64.7% were hypertensives, 17.0% diabetics. The percentage of participants with CaC = 0 was 44.8, 40.6, and 33.5 in HVA, NVA, and EVA, respectively. During a mean follow up of 4.7 years, 67 participants died. Mortality was 0% / 2.2%, 1.8% / 4.8%, 3.5% / 7.1% in participants with HVA: CaC 0 / >0, NVA: CaC 0 / >0, EVA: CaC 0 / >0, respectively (p=0.003, log rank test) – Figure. In Cox regression analysis, vascular aging (HR for HVA: 0.18, CI 0.04–0.73, and HR for NVA: 0.48, CI 0.27–0.88; both compared to EVA), CaC, as well as age (directly related) and diastolic blood pressure (inversely related) were independently associated with all-cause mortality.

**Conclusion:** Aortic stiffness, expressed as vascular aging, as well as coronary artery calcium, provide additive and independent prognostic information regarding all-cause mortality in a middle-aged and elderly primary prevention population.

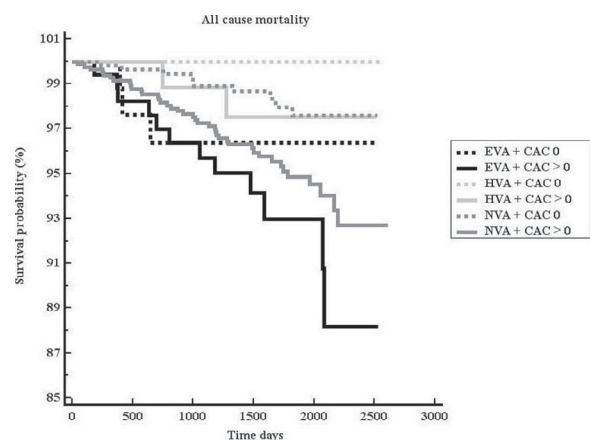

Figure 1
